# Supplementary material for: Retracted Article: Long non-coding RNA PCAT1 facilitates cell growth in multiple myeloma through an MTDH-mediated AKT/β-catenin signaling pathway by sponging miR-363-3p
Source: Royal Society of Chemistry journal article supplement (doi:10.1039/c9ra06188f), 2019-01-01
Supplement: c9ra06188f1.pdf [file c9ra06188f1.pdf]

Fig.1A

| PCAT1  |      |
|--------|------|
| Normal | MM   |
| 1.02   | 1.06 |
| 1.06   | 0.99 |
| 1.12   | 0.87 |
| 1.25   | 0.86 |
| 1.23   | 0.99 |
| 1.34   | 0.94 |
| 1.06   | 1.02 |
| 0.95   | 1.03 |
| 0.88   | 1.12 |
| 0.76   | 1.23 |
| 1.12   | 1.24 |
| 1.16   | 1.16 |
| 1.32   | 1.35 |
| 1.42   | 1.46 |
| 1.55   | 1.48 |
| 0.89   | 1.85 |
| 0.91   | 1.95 |
| 0.96   | 1.69 |
| 1.05   | 1.77 |
| 1.09   | 1.79 |
| 0.68   | 1.99 |
| 0.84   | 2.15 |
|        | 2.06 |
|        | 2.35 |
|        | 2.34 |
|        | 2.45 |
|        | 2.89 |
|        | 3.06 |
|        | 3.08 |
|        | 2.48 |
|        | 2.16 |
|        | 1.85 |
|        | 3.22 |
|        | 1.97 |
|        | 2.28 |
|        | 2.65 |

Fig. 1B

| Normal | MM   |
|--------|------|
| 0.95   | 1.86 |
| 0.92   | 1.59 |
| 0.77   | 1.54 |
| 0.88   | 1.23 |
| 0.84   | 1.35 |
| 0.86   | 1.45 |
| 0.69   | 1.52 |
| 0.95   | 1.56 |
| 0.99   | 1.67 |
| 1.06   | 1.78 |
| 1.03   | 1.85 |
| 1.25   | 1.69 |
| 1.36   | 2.74 |
| 1.56   | 2.59 |
| 1.46   | 3.06 |
| 1.58   | 2.98 |
| 1.78   | 2.84 |
| 1.95   | 2.76 |
| 2.03   | 2.65 |
| 1.44   | 2.26 |
| 1.06   | 2.15 |
| 1.21   | 2.65 |
|        | 4.06 |
|        | 3.69 |
|        | 3.25 |
|        | 2.77 |
|        | 2.71 |
|        | 2.73 |
|        | 2.65 |
|        | 2.65 |
|        | 4.58 |
|        | 4.35 |
|        | 5.26 |
|        | 5.06 |
|        | 4.58 |
|        | 4.35 |

Fig. 1C

| PCAT1 | MTDH |
|-------|------|
| 1.06  | 1.86 |
| 0.99  | 1.59 |
| 0.87  | 1.54 |
| 0.86  | 1.23 |
| 0.99  | 1.35 |
| 0.94  | 1.45 |
| 1.02  | 1.52 |
| 1.03  | 1.56 |
| 1.12  | 1.67 |
| 1.23  | 1.78 |
| 1.24  | 1.85 |
| 1.16  | 1.69 |
| 1.35  | 2.74 |
| 1.46  | 2.59 |
| 1.48  | 3.06 |
| 1.85  | 2.98 |
| 1.95  | 2.84 |
| 1.69  | 2.76 |
| 1.77  | 2.65 |
| 1.79  | 2.26 |
| 1.99  | 2.15 |
| 2.15  | 2.65 |
| 2.06  | 4.06 |
| 2.35  | 3.69 |
| 2.34  | 3.25 |
| 2.45  | 2.77 |
| 2.89  | 2.71 |
| 3.06  | 2.73 |
| 3.08  | 2.65 |
| 2.48  | 2.65 |
| 2.16  | 4.58 |
| 1.85  | 4.35 |
| 3.22  | 5.26 |
| 1.97  | 5.06 |
| 2.28  | 4.58 |
| 2.65  | 4.35 |

Fig.1D

| Months elapsed | PCAT1          |                 |
|----------------|----------------|-----------------|
|                | Low expression | High expression |
| 60             | 0              |                 |
| 60             | 0              |                 |
| 60             | 0              |                 |
| 60             | 0              |                 |
| 42             | 1              |                 |
| 60             | 0              |                 |
| 20             | 1              |                 |
| 16             | 1              |                 |
| 60             | 0              |                 |
| 60             | 0              |                 |
| 32             | 1              |                 |
| 60             | 0              |                 |
| 12             | 1              |                 |
| 60             | 0              |                 |
| 8              | 1              |                 |
| 60             |                | 0               |
| 60             |                | 0               |
| 60             | 0              |                 |
| 22             | 1              |                 |
| 24             | 1              |                 |
| 60             |                | 0               |
| 60             |                | 0               |
| 6              |                | 1               |
| 6              |                | 1               |
| 6              |                | 1               |
| 8              |                | 1               |
| 14             |                | 1               |
| 20             |                | 1               |
| 24             |                | 1               |
| 25             |                | 1               |
| 26             |                | 1               |
| 33             |                | 1               |
| 36             |                | 1               |
| 12             |                | 1               |
| 12             |                | 1               |
| 12             |                | 1               |

Fig.1E

| Months<br>elapsed | MTDH              |                    |
|-------------------|-------------------|--------------------|
|                   | Low<br>expression | High<br>expression |
| 60                | 0                 |                    |
| 60                | 0                 |                    |
| 60                | 0                 |                    |
| 60                | 0                 |                    |
| 42                | 1                 |                    |
| 60                | 0                 |                    |
| 20                | 1                 |                    |
| 16                | 1                 |                    |
| 60                | 0                 |                    |
| 60                | 0                 |                    |
| 32                | 1                 |                    |
| 60                | 0                 |                    |
| 12                |                   | 1                  |
| 60                | 0                 |                    |
| 8                 |                   | 1                  |
| 60                |                   | 0                  |
| 60                |                   | 0                  |
| 60                |                   | 0                  |
| 22                |                   | 1                  |
| 24                | 1                 |                    |
| 60                | 0                 |                    |
| 60                |                   | 0                  |
| 6                 |                   | 1                  |
| 6                 |                   | 1                  |
| 6                 |                   | 1                  |
| 8                 |                   | 1                  |
| 14                |                   | 1                  |
| 20                |                   | 1                  |
| 24                |                   | 1                  |
| 25                |                   | 1                  |
| 26                |                   | 1                  |
| 33                |                   | 1                  |
| 36                |                   | 1                  |
| 12                |                   | 1                  |
| 12                |                   | 1                  |
| 12                |                   | 1                  |

Fig.2A

Fig.2B

| PCAT1  | sh-NC |      |      | sh-PCAT1 |      |      |
|--------|-------|------|------|----------|------|------|
| OPM2   | 1.06  | 1.09 | 0.84 | 0.27     | 0.24 | 0.33 |
| U266B1 | 0.95  | 0.96 | 1.09 | 0.32     | 0.28 | 0.24 |

Fig.2C

| OPM2 | sh-NC |      |      | sh-PCAT1 |      |      |
|------|-------|------|------|----------|------|------|
| 24h  | 0.32  | 0.29 | 0.35 | 0.26     | 0.27 | 0.24 |
| 48h  | 0.58  | 0.52 | 0.51 | 0.38     | 0.42 | 0.3  |
| 72h  | 0.89  | 0.84 | 0.8  | 0.5      | 0.54 | 0.48 |

Fig.2D

| U266B1 | sh-NC |      |      | sh-PCAT1 |      |      |
|--------|-------|------|------|----------|------|------|
| 24h    | 0.42  | 0.4  | 0.39 | 0.32     | 0.3  | 0.35 |
| 48h    | 0.64  | 0.61 | 0.53 | 0.43     | 0.46 | 0.39 |
| 72h    | 0.98  | 0.92 | 0.89 | 0.58     | 0.66 | 0.52 |

Fig.2E

| OPM2 | sh-NC |      |      | sh-PCAT1 |      |      |
|------|-------|------|------|----------|------|------|
| G1   | 52    | 54   | 50.2 | 62       | 63   | 67   |
| S    | 38    | 34.5 | 30.5 | 22.3     | 26.4 | 24.4 |

Fig.2F

| U266B1 | sh-NC |      |      | sh-PCAT1 |      |      |
|--------|-------|------|------|----------|------|------|
| G1     | 50    | 56.9 | 48.6 | 58.5     | 62.5 | 65.4 |
| S      | 35.6  | 32.6 | 37.4 | 26.5     | 23.5 | 20.3 |

Fig.2G

|        | sh-NC |     |     | sh-PCAT1 |      |      |
|--------|-------|-----|-----|----------|------|------|
| OPM2   | 6.8   | 5.9 | 6.3 | 23.6     | 18.5 | 17.6 |
| U266B1 | 5.2   | 5.6 | 7.2 | 20.6     | 15.6 | 19.8 |

Fig.2H

| OPM2     | sh-NC |      |      | sh-PCAT1 |      |      |
|----------|-------|------|------|----------|------|------|
| CyclinD1 | 1.06  | 1.03 | 0.91 | 0.48     | 0.52 | 0.46 |
| c-Myc    | 1.08  | 1.09 | 0.83 | 0.38     | 0.42 | 0.46 |
| Bcl-2    | 0.94  | 0.92 | 1.04 | 0.51     | 0.52 | 0.56 |
| Bax      | 0.97  | 0.96 | 1.07 | 1.85     | 1.95 | 2.15 |

Fig.2I

| U266B1   | sh-NC |      |      | sh-PCAT1 |      |      |
|----------|-------|------|------|----------|------|------|
| CyclinD1 | 0.96  | 1.03 | 1.01 | 0.48     | 0.42 | 0.46 |
| c-Myc    | 0.98  | 1.09 | 0.93 | 0.52     | 0.54 | 0.56 |
| Bcl-2    | 1.04  | 0.92 | 0.94 | 0.61     | 0.52 | 0.63 |
| Bax      | 1.07  | 0.96 | 0.97 | 2.12     | 2.35 | 2.26 |

Fig.3A

Fig.3B

| MTDH   | sh-NC |      |      | sh-MTDH |      |      |
|--------|-------|------|------|---------|------|------|
| OPM2   | 0.96  | 0.98 | 1.06 | 0.36    | 0.42 | 0.29 |
| U266B1 | 1.05  | 1.06 | 0.89 | 0.45    | 0.39 | 0.32 |

Fig.3C

| OPM2 | sh-NC |      |      | sh-MTDH |      |      |
|------|-------|------|------|---------|------|------|
| 24h  | 0.26  | 0.28 | 0.32 | 0.25    | 0.22 | 0.23 |
| 48h  | 0.52  | 0.46 | 0.51 | 0.42    | 0.45 | 0.4  |
| 72h  | 0.91  | 0.94 | 0.84 | 0.61    | 0.64 | 0.52 |

Fig.3D

| U266B1 | sh-NC |      |      | sh-MTDH |      |      |
|--------|-------|------|------|---------|------|------|
| 24h    | 0.34  | 0.33 | 0.39 | 0.28    | 0.26 | 0.33 |
| 48h    | 0.54  | 0.61 | 0.5  | 0.43    | 0.4  | 0.39 |
| 72h    | 0.84  | 0.82 | 0.99 | 0.54    | 0.6  | 0.52 |

Fig.3E

| OPM2 | sh-NC |    |      | sh-MTDH |      |      |
|------|-------|----|------|---------|------|------|
| G1   | 48    | 54 | 50   | 64      | 60   | 63   |
| S    | 32    | 30 | 35.6 | 20.3    | 19.6 | 22.5 |

Fig.3F

| U266B1 | sh-NC |    |    | sh-MTDH |    |    |
|--------|-------|----|----|---------|----|----|
| G1     | 46    | 50 | 58 | 59      | 66 | 69 |
| S      | 34    | 28 | 22 | 25      | 16 | 17 |

Fig.3G

|        | sh-NC |     |     | sh-MTDH |      |      |
|--------|-------|-----|-----|---------|------|------|
| OPM2   | 5.8   | 4.6 | 6.1 | 24.6    | 22.3 | 21.4 |
| U266B1 | 6.2   | 6.6 | 4.5 | 24.3    | 25.3 | 18.3 |

Fig.3H

| OPM2     | sh-NC |      |      | sh-MTDH |      |      |
|----------|-------|------|------|---------|------|------|
| CyclinD1 | 1.05  | 1.03 | 0.92 | 0.5     | 0.52 | 0.45 |
| c-Myc    | 1.08  | 1.05 | 0.87 | 0.4     | 0.42 | 0.43 |
| Bcl-2    | 1.04  | 0.95 | 1.01 | 0.51    | 0.42 | 0.46 |
| Bax      | 0.97  | 0.96 | 1.07 | 1.75    | 1.69 | 1.51 |

Fig.3I



| U266B1   | sh-NC |      |      | sh-MTDH |      |      |
|----------|-------|------|------|---------|------|------|
| CyclinD1 | 0.96  | 1.03 | 1.01 | 0.48    | 0.51 | 0.46 |
| c-Myc    | 1.08  | 1.09 | 0.83 | 0.43    | 0.44 | 0.56 |
| Bcl-2    | 1.04  | 0.99 | 0.97 | 0.51    | 0.52 | 0.43 |
| Bax      | 1.1   | 0.96 | 0.94 | 1.85    | 1.96 | 1.77 |

Fig.4A

| MTDH mRNA | sh-NC |      |      | sh-PCAT1 |      |      | pcDNA |      |      | PCAT1 |      |      |
|-----------|-------|------|------|----------|------|------|-------|------|------|-------|------|------|
|           | OPM2  | 0.99 | 0.98 | 1.03     | 0.46 | 0.42 | 0.39  | 0.98 | 1.02 | 1     | 2.15 | 2.23 |
| U266B1    | 1.05  | 1.04 | 0.91 | 0.55     | 0.4  | 0.37 | 1.08  | 1.04 | 0.88 | 2.34  | 1.95 | 2.12 |

Fig.4B

| MTDH protein | sh-NC |      |      | sh-PCAT1 |      |      | pcDNA |      |      | PCAT1 |      |      |
|--------------|-------|------|------|----------|------|------|-------|------|------|-------|------|------|
|              | OPM2  | 1.05 | 0.98 | 0.87     | 0.56 | 0.52 | 0.59  | 0.92 | 0.98 | 1.1   | 1.5  | 1.63 |
| U266B1       | 0.95  | 1.06 | 0.99 | 0.45     | 0.49 | 0.42 | 1.02  | 1.06 | 0.92 | 1.68  | 1.75 | 1.79 |

Fig.4C

| OPM2 | sh-NC |      |      | sh-PCAT1 |      |      | sh-PCAT1+pcDNA |      |      | sh-PCAT1+MTDH |      |      |
|------|-------|------|------|----------|------|------|----------------|------|------|---------------|------|------|
|      | 24h   | 0.26 | 0.24 | 0.3      | 0.22 | 0.2  | 0.21           | 0.2  | 0.19 | 0.21          | 0.22 | 0.23 |
| 48h  | 0.54  | 0.66 | 0.58 | 0.34     | 0.32 | 0.37 | 0.3            | 0.29 | 0.34 | 0.39          | 0.43 | 0.44 |
| 72h  | 0.93  | 0.94 | 0.9  | 0.54     | 0.56 | 0.42 | 0.5            | 0.46 | 0.43 | 0.75          | 0.86 | 0.74 |

Fig.4D

| U266B1 | sh-NC |      |      | sh-PCAT1 |      |      | sh-PCAT1+pcDNA |      |      | sh-PCAT1+MTDH |      |      |
|--------|-------|------|------|----------|------|------|----------------|------|------|---------------|------|------|
|        | 24h   | 0.34 | 0.33 | 0.29     | 0.24 | 0.26 | 0.29           | 0.2  | 0.24 | 0.22          | 0.25 | 0.27 |
| 48h    | 0.54  | 0.61 | 0.51 | 0.4      | 0.37 | 0.36 | 0.39           | 0.44 | 0.36 | 0.45          | 0.48 | 0.51 |
| 72h    | 0.99  | 0.95 | 0.87 | 0.51     | 0.45 | 0.52 | 0.52           | 0.6  | 0.54 | 0.85          | 0.76 | 0.79 |

Fig.4E

| OPM2 | sh-NC |    |    | sh-PCAT1 |    |    | sh-PCAT1+pcDNA |    |    | sh-PCAT1+MTDH |    |    |
|------|-------|----|----|----------|----|----|----------------|----|----|---------------|----|----|
|      | G1    | 46 | 52 | 48       | 62 | 65 | 58             | 60 | 63 | 64            | 50 | 51 |
| S    | 37    | 32 | 34 | 22       | 20 | 17 | 16             | 24 | 21 | 35            | 36 | 30 |

Fig.4F

| OPM2   | sh-NC |     |     | sh-PCAT1 |      |      | sh-PCAT1+pcDNA |      |      | sh-PCAT1+MTDH |      |     |
|--------|-------|-----|-----|----------|------|------|----------------|------|------|---------------|------|-----|
|        | OPM2  | 5.5 | 5.2 | 5.9      | 26.5 | 23.1 | 20.3           | 20.3 | 21.5 | 25.6          | 8.5  | 6.9 |
| U266B1 | 7.2   | 6.6 | 5.5 | 19.6     | 25.6 | 26.3 | 18.5           | 19.4 | 24.6 | 10.3          | 11.2 | 8.8 |

Fig.4G

| OPM2   | sh-NC |     |     | sh-PCAT1 |      |      | sh-PCAT1+pcDNA |      |      | sh-PCAT1+MTDH |      |     |
|--------|-------|-----|-----|----------|------|------|----------------|------|------|---------------|------|-----|
|        | OPM2  | 5.5 | 5.2 | 5.9      | 26.5 | 23.1 | 20.3           | 20.3 | 21.5 | 25.6          | 8.5  | 6.9 |
| U266B1 | 7.2   | 6.6 | 5.5 | 19.6     | 25.6 | 26.3 | 18.5           | 19.4 | 24.6 | 10.3          | 11.2 | 8.8 |

Fig.4H

| OPM2     | sh-NC |      |      | sh-PCAT1 |      |      | sh-PCAT1+pcDNA |      |      | sh-PCAT1+MTDH |      |      |
|----------|-------|------|------|----------|------|------|----------------|------|------|---------------|------|------|
| CyclinD1 | 1.05  | 1.06 | 0.89 | 0.52     | 0.48 | 0.55 | 0.48           | 0.43 | 0.59 | 0.95          | 0.98 | 1.03 |
| c-Myc    | 1.08  | 1.05 | 0.87 | 0.39     | 0.44 | 0.45 | 0.42           | 0.38 | 0.49 | 0.78          | 0.85 | 0.91 |
| Bcl-2    | 0.94  | 0.95 | 1.11 | 0.36     | 0.34 | 0.35 | 0.3            | 0.38 | 0.41 | 0.89          | 0.92 | 0.94 |
| Bax      | 1.05  | 0.96 | 0.89 | 1.95     | 2.12 | 2.21 | 1.89           | 2.06 | 2.08 | 1.21          | 1.16 | 1.09 |

Fig.4I

| U266B1   | sh-NC |      |      | sh-PCAT1 |      |      | sh-PCAT1+pcDNA |      |      | sh-PCAT1+MTDH |      |      |
|----------|-------|------|------|----------|------|------|----------------|------|------|---------------|------|------|
| CyclinD1 | 1.05  | 0.96 | 0.99 | 0.42     | 0.48 | 0.45 | 0.38           | 0.43 | 0.49 | 0.94          | 0.96 | 1.03 |
| c-Myc    | 0.88  | 1.05 | 1.07 | 0.39     | 0.44 | 0.35 | 0.42           | 0.38 | 0.39 | 0.89          | 0.92 | 0.99 |
| Bcl-2    | 0.94  | 0.95 | 1.11 | 0.46     | 0.54 | 0.55 | 0.5            | 0.48 | 0.51 | 1.12          | 1.06 | 0.94 |
| Bax      | 1.09  | 0.96 | 0.85 | 2.21     | 2.23 | 2.16 | 2.08           | 2.11 | 2.18 | 1.31          | 1.22 | 1.12 |

Fig. 5A

| miR-363-3p |      |
|------------|------|
| Normal     | MM   |
| 0.95       | 1.86 |
| 0.92       | 1.59 |
| 0.77       | 1.54 |
| 0.88       | 1.23 |
| 0.84       | 1.35 |
| 0.86       | 1.45 |
| 0.69       | 1.52 |
| 0.95       | 1.56 |
| 0.99       | 1.67 |
| 1.06       | 1.78 |
| 1.03       | 1.85 |
| 1.25       | 1.69 |
| 1.36       | 2.74 |
| 1.56       | 2.59 |
| 1.46       | 3.06 |
| 1.58       | 2.98 |
| 1.78       | 2.84 |
| 1.95       | 2.76 |
| 2.03       | 2.65 |
| 1.44       | 2.26 |
| 1.06       | 2.15 |
| 1.21       | 2.65 |
|            | 4.06 |
|            | 3.69 |
|            | 3.25 |
|            | 2.77 |
|            | 2.71 |
|            | 2.73 |
|            | 2.65 |
|            | 2.65 |
|            | 4.58 |
|            | 4.35 |
|            | 5.26 |
|            | 5.06 |
|            | 4.58 |
|            | 4.35 |

Fig. 5B

| nPCs |      | OPM2 |      |      | U266B1 |      |      |      |
|------|------|------|------|------|--------|------|------|------|
| 1.06 | 0.92 | 0.92 | 0.55 | 0.51 | 0.43   | 0.46 | 0.45 | 0.41 |

Fig. 5C

| miR-363-3p | PCAT1 |
|------------|-------|
| 0.68       | 1.06  |
| 0.62       | 0.99  |
| 0.53       | 0.87  |
| 0.58       | 0.86  |
| 0.54       | 0.99  |
| 0.52       | 0.94  |
| 0.53       | 1.02  |
| 0.59       | 1.03  |
| 0.66       | 1.12  |
| 0.48       | 1.23  |
| 0.49       | 1.24  |
| 0.43       | 1.16  |
| 0.45       | 1.35  |
| 0.46       | 1.46  |
| 0.39       | 1.48  |
| 0.35       | 1.85  |
| 0.48       | 1.95  |
| 0.32       | 1.69  |
| 0.36       | 1.77  |
| 0.29       | 1.79  |
| 0.28       | 1.99  |
| 0.45       | 2.15  |
| 0.39       | 2.06  |
| 0.31       | 2.35  |
| 0.37       | 2.34  |
| 0.27       | 2.45  |
| 0.28       | 2.89  |
| 0.41       | 3.06  |
| 0.61       | 3.08  |
| 0.31       | 2.48  |
| 0.22       | 2.16  |
| 0.19       | 1.85  |
| 0.23       | 3.22  |
| 0.43       | 1.97  |
| 0.32       | 2.28  |
| 0.26       | 2.65  |

Fig. 5D

| miR-363-3p | MTDH |
|------------|------|
| 0.68       | 1.86 |
| 0.62       | 1.59 |
| 0.53       | 1.54 |
| 0.58       | 1.23 |
| 0.54       | 1.35 |
| 0.52       | 1.45 |
| 0.53       | 1.52 |
| 0.59       | 1.56 |
| 0.66       | 1.67 |
| 0.48       | 1.78 |
| 0.49       | 1.85 |
| 0.43       | 1.69 |
| 0.45       | 2.74 |
| 0.46       | 2.59 |
| 0.39       | 3.06 |
| 0.35       | 2.98 |
| 0.48       | 2.84 |
| 0.32       | 2.76 |
| 0.36       | 2.65 |
| 0.29       | 2.26 |
| 0.28       | 2.15 |
| 0.45       | 2.65 |
| 0.39       | 4.06 |
| 0.31       | 3.69 |
| 0.37       | 3.25 |
| 0.27       | 2.77 |
| 0.28       | 2.71 |
| 0.41       | 2.73 |
| 0.61       | 2.65 |
| 0.31       | 2.65 |
| 0.22       | 4.58 |
| 0.19       | 4.35 |
| 0.23       | 5.26 |
| 0.43       | 5.06 |
| 0.32       | 4.58 |
| 0.26       | 4.35 |

**Fig.5G**

| OPM2      | miR-NC |      |      | miR-363-3p |      |      |
|-----------|--------|------|------|------------|------|------|
| WT-PCAT1  | 0.99   | 1.02 | 0.99 | 0.47       | 0.52 | 0.51 |
| MUT-PCAT1 | 1.03   | 0.97 | 1    | 1.05       | 1.02 | 0.94 |

**Fig.5H**

| U266B1    | miR-NC |      |      | miR-363-3p |      |      |
|-----------|--------|------|------|------------|------|------|
| WT-PCAT1  | 1.1    | 1.03 | 0.87 | 0.43       | 0.46 | 0.47 |
| MUT-PCAT1 | 1.05   | 1.05 | 0.9  | 0.94       | 0.98 | 1.03 |

**Fig.5I**

| OPM2           | miR-NC |      |      | miR-363-3p |      |      |
|----------------|--------|------|------|------------|------|------|
| MTDH 3'UTR-WT  | 1.09   | 1.02 | 0.89 | 0.51       | 0.52 | 0.43 |
| MTDH 3'UTR-MUT | 1.08   | 1.1  | 0.82 | 1.05       | 0.92 | 1.03 |

**Fig.5J**

| U266B1         | miR-NC |      |      | miR-363-3p |      |      |
|----------------|--------|------|------|------------|------|------|
| MTDH 3'UTR-WT  | 0.95   | 0.95 | 1.1  | 0.43       | 0.4  | 0.43 |
| MTDH 3'UTR-MUT | 1.02   | 0.96 | 1.04 | 1.05       | 1.06 | 0.94 |

**Fig.5K**

|        | sh-NC |      | sh-PCAT1 |      |      | pcDNA |      |      | PCAT1 |      |      |      |
|--------|-------|------|----------|------|------|-------|------|------|-------|------|------|------|
| OPM2   | 0.98  | 1.04 | 0.98     | 1.95 | 1.94 | 2.03  | 1.06 | 1.02 | 0.92  | 0.43 | 0.52 | 0.39 |
| U266B1 | 0.93  | 1.06 | 1.01     | 1.99 | 1.95 | 2.15  | 1.01 | 0.95 | 0.94  | 0.46 | 0.4  | 0.38 |

**Fig.5L**

| MTDH mRNA | miR-NC |      |      | miR-363-3p |      |      | miR-363-3p+pcDNA |      |      | miR-363-3p+PCAT1 |      |      |
|-----------|--------|------|------|------------|------|------|------------------|------|------|------------------|------|------|
| OPM2      | 1.09   | 1.16 | 0.75 | 0.34       | 0.39 | 0.36 | 0.42             | 0.35 | 0.41 | 0.85             | 0.92 | 0.94 |
| U266B1    | 1.12   | 0.98 | 0.9  | 0.42       | 0.45 | 0.31 | 0.39             | 0.45 | 0.38 | 0.88             | 0.91 | 0.84 |

**Fig.5M**

| MTDH protein | miR-NC |      |      | miR-363-3p |      |      | miR-363-3p+pcDNA |      |      | miR-363-3p+PCAT1 |      |      |
|--------------|--------|------|------|------------|------|------|------------------|------|------|------------------|------|------|
| OPM2         | 0.99   | 1.16 | 0.85 | 0.43       | 0.41 | 0.46 | 0.32             | 0.39 | 0.36 | 0.75             | 0.85 | 0.81 |

U266B1 1.1 0.95 0.95 0.48 0.43 0.46 0.39 0.42 0.46 0.86 0.92 0.76

Fig.7A

|     | sh-NC |     |     |     |     | sh-PCAT1 |     |     |     |     |
|-----|-------|-----|-----|-----|-----|----------|-----|-----|-----|-----|
| D7  | 72    | 65  | 56  | 48  | 35  | 42       | 36  | 35  | 30  | 29  |
| D14 | 153   | 132 | 129 | 120 | 103 | 85       | 72  | 69  | 62  | 51  |
| D21 | 354   | 312 | 296 | 305 | 234 | 152      | 142 | 116 | 102 | 86  |
| D28 | 655   | 602 | 568 | 513 | 436 | 279      | 236 | 210 | 185 | 152 |
| D35 | 895   | 821 | 756 | 703 | 659 | 402      | 362 | 351 | 302 | 276 |

Fig.7B

|  | sh-NC |     |     |     |     | sh-PCAT1 |     |     |     |     |
|--|-------|-----|-----|-----|-----|----------|-----|-----|-----|-----|
|  | 852   | 756 | 702 | 658 | 603 | 365      | 325 | 312 | 276 | 243 |

Fig.7C

|            | sh-NC |      |      | sh-PCAT1 |      |      |
|------------|-------|------|------|----------|------|------|
| PCAT1      | 0.96  | 1.05 | 0.99 | 0.35     | 0.39 | 0.48 |
| miR-363-3p | 1.09  | 1.06 | 0.85 | 1.56     | 1.95 | 1.88 |
| MTDH       | 1.09  | 0.98 | 0.83 | 0.51     | 0.53 | 0.42 |

Fig.7D

|  | sh-NC |      |      | sh-PCAT1 |      |      |
|--|-------|------|------|----------|------|------|
|  | 1.1   | 1.05 | 0.85 | 0.56     | 0.62 | 0.51 |



**Fig. 1B**

| Normal | MM   |
|--------|------|
| 0.95   | 1.86 |
| 0.92   | 1.59 |
| 0.77   | 1.54 |
| 0.88   | 1.23 |
| 0.84   | 1.35 |
| 0.86   | 1.45 |
| 0.69   | 1.52 |
| 0.95   | 1.56 |
| 0.99   | 1.67 |
| 1.06   | 1.78 |
| 1.03   | 1.85 |
| 1.25   | 1.69 |
| 1.36   | 2.74 |
| 1.56   | 2.59 |
| 1.46   | 3.06 |
| 1.58   | 2.98 |
| 1.78   | 2.84 |
| 1.95   | 2.76 |
| 2.03   | 2.65 |
| 1.44   | 2.26 |
| 1.06   | 2.15 |
| 1.21   | 2.65 |

4.06  
3.69  
3.25  
2.77  
2.71  
2.73  
2.65  
2.65  
4.58  
4.35  
5.26  
5.06  
4.58  
4.35

Fig. 1C

| PCAT1 | MTDH |
|-------|------|
| 1.06  | 1.86 |
| 0.99  | 1.59 |
| 0.87  | 1.54 |
| 0.86  | 1.23 |
| 0.99  | 1.35 |
| 0.94  | 1.45 |
| 1.02  | 1.52 |
| 1.03  | 1.56 |
| 1.12  | 1.67 |
| 1.23  | 1.78 |
| 1.24  | 1.85 |
| 1.16  | 1.69 |
| 1.35  | 2.74 |
| 1.46  | 2.59 |
| 1.48  | 3.06 |
| 1.85  | 2.98 |
| 1.95  | 2.84 |
| 1.69  | 2.76 |
| 1.77  | 2.65 |
| 1.79  | 2.26 |
| 1.99  | 2.15 |

|      |      |
|------|------|
| 2.15 | 2.65 |
| 2.06 | 4.06 |
| 2.35 | 3.69 |
| 2.34 | 3.25 |
| 2.45 | 2.77 |
| 2.89 | 2.71 |
| 3.06 | 2.73 |
| 3.08 | 2.65 |
| 2.48 | 2.65 |
| 2.16 | 4.58 |
| 1.85 | 4.35 |
| 3.22 | 5.26 |
| 1.97 | 5.06 |
| 2.28 | 4.58 |
| 2.65 | 4.35 |

Fig.1D

| Months<br>elapsed | PCAT1             |                    |
|-------------------|-------------------|--------------------|
|                   | Low<br>expression | High<br>expression |
| 60                | 0                 |                    |
| 60                | 0                 |                    |
| 60                | 0                 |                    |
| 60                | 0                 |                    |
| 42                | 1                 |                    |
| 60                | 0                 |                    |
| 20                | 1                 |                    |
| 16                | 1                 |                    |
| 60                | 0                 |                    |
| 60                | 0                 |                    |
| 32                | 1                 |                    |
| 60                | 0                 |                    |
| 12                | 1                 |                    |
| 60                | 0                 |                    |
| 8                 | 1                 |                    |
| 60                |                   | 0                  |
| 60                |                   | 0                  |
| 60                | 0                 |                    |

|    |   |   |
|----|---|---|
| 22 | 1 |   |
| 24 | 1 |   |
| 60 |   | 0 |
| 60 |   | 0 |
| 6  |   | 1 |
| 6  |   | 1 |
| 6  |   | 1 |
| 8  |   | 1 |
| 14 |   | 1 |
| 20 |   | 1 |
| 24 |   | 1 |
| 25 |   | 1 |
| 26 |   | 1 |
| 33 |   | 1 |
| 36 |   | 1 |
| 12 |   | 1 |
| 12 |   | 1 |
| 12 |   | 1 |

Fig.1E

| Months<br>elapsed | MTDH              |                    |
|-------------------|-------------------|--------------------|
|                   | Low<br>expression | High<br>expression |
| 60                | 0                 |                    |
| 60                | 0                 |                    |
| 60                | 0                 |                    |
| 60                | 0                 |                    |
| 42                | 1                 |                    |
| 60                | 0                 |                    |
| 20                | 1                 |                    |
| 16                | 1                 |                    |
| 60                | 0                 |                    |
| 60                | 0                 |                    |
| 32                | 1                 |                    |
| 60                | 0                 |                    |
| 12                |                   | 1                  |
| 60                | 0                 |                    |
| 8                 |                   | 1                  |
| 60                |                   | 0                  |
| 60                |                   | 0                  |
| 60                |                   | 0                  |
| 22                |                   | 1                  |
| 24                | 1                 |                    |
| 60                | 0                 |                    |
| 60                |                   | 0                  |
| 6                 |                   | 1                  |
| 6                 |                   | 1                  |
| 6                 |                   | 1                  |
| 8                 |                   | 1                  |
| 14                |                   | 1                  |
| 20                |                   | 1                  |
| 24                |                   | 1                  |
| 25                |                   | 1                  |
| 26                |                   | 1                  |
| 33                |                   | 1                  |
| 36                |                   | 1                  |
| 12                |                   | 1                  |
| 12                |                   | 1                  |
| 12                |                   | 1                  |
